# Supplementary material for: Chronic Reduction of GIP Secretion Alleviates Obesity and Insulin Resistance Under High-Fat Diet Conditions
Source: Oxford University Press journal article supplement (doi:10.2337/db13-1563), 2014-03-01

# SUPPLEMENTARY DATA

**Supplementary Figure 1.** Body weight progression and insulin sensitivity in standard chowfed mice. Body weight (A) of WT, GIPgfp/+, and GIPgfp/gfp mice on CFD was measured once per week during 8 weeks (56 days), starting from 7 weeks of age. ITT (insulin 0.5 U/kg of body weight) was conducted after 8 weeks of standard diet feeding (B). n=5-6 mice per group. WT mice are represented by white circles with solid dash, GIPgfp/+ mice by black squares, and GIPgfp/gfp mice by gray triangles. \*p<0.05 GIPgfp/gfp vs WT.

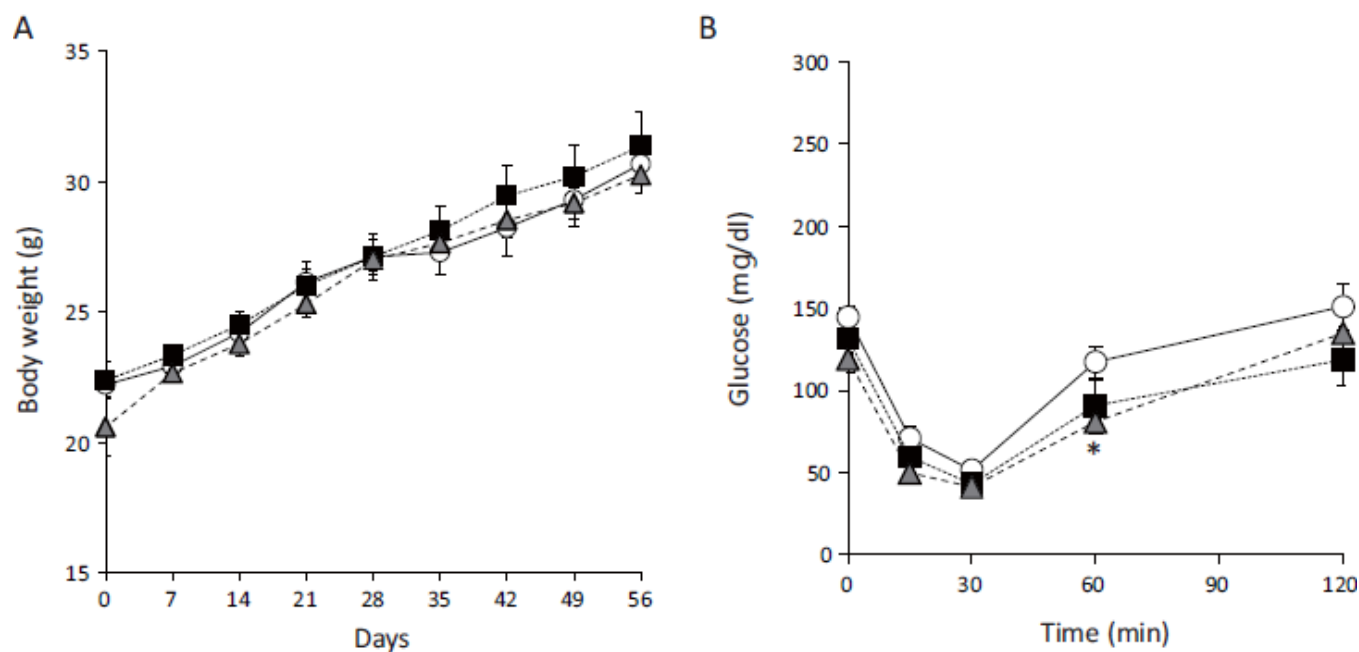

Supplement: db131563supplementarydata.pdf [file db131563supplementarydata.pdf]
